# Supplementary material for: Using Baidu index to nowcast hand-foot-mouth disease in China: a meta learning approach
Source: Springer Nature journal article supplement (doi:10.1186/s12879-018-3285-4), 2018-08-13
Supplement: MOESM1 [file 16031276]

Table S1. Baidu search keywords correlated with 'HFMD' obtained from 'Chinaz'.

| No. | Keyword                                                   | No. | Keyword                                               | No. | Keyword                                      |
|-----|-----------------------------------------------------------|-----|-------------------------------------------------------|-----|----------------------------------------------|
| 1   | 大人手足口病症<br>symptoms of adult HFMD                         | 2   | 儿童手足口病<br>children HFMD                               | 3   | 儿童手足口病症状<br>symptoms of children HFMD        |
| 4   | 如何预防手足口病<br>how to prevent HFMD                           | 5   | 什么是手足口病<br>what is HFMD                               | 6   | 手足口<br>hand foot mouth                       |
| 7   | 手足口病<br>hand-foot-month-diseases                          | 8   | 手足口病并发症<br>complication of HFMD                       | 9   | 手足口病吃什么药<br>what drugs to take to treat HFMD |
| 10  | 手足口病初期症状图<br>pictures of initial symptoms of HFMD         | 11  | 手足口病的传播途径<br>transmission path of HFMD                | 12  | 手足口病的预防<br>prevention of HFMD                |
| 13  | 手足口病的症状<br>symptoms of HFMD                               | 14  | 手足口病的治疗<br>treatment of HFMD                          | 15  | 手足口病 症状<br>symptoms of HFMD                  |
| 16  | 手足口病防治知识<br>knowledge of HFMD<br>prevention and treatment | 17  | 手足口病防治指南<br>guide of HFMD prevention and<br>treatment | 18  | 手足口病疱疹怎么治<br>how to treat herpes of HFMD     |
| 19  | 手足口病前期症状<br>initial symptoms of HFMD                      | 20  | 手足口病特征<br>features of HFMD                            | 21  | 手足口病图片<br>pictures of HFMD                   |
| 22  | 手足口病严重吗<br>is HFMD severe                                 | 23  | 手足口病疫情<br>HFMD epidemics                              | 24  | 手足口病应急预案<br>emergency plan of HFMD           |
| 25  | 手足口病用什么药<br>what HFMD drugs to use                        | 26  | 手足口病用药<br>HFMD drugs                                  | 27  | 手足口病有什么症状<br>what symptoms of HFMD           |
| 28  | 手足口病预防<br>prevention of HFMD                              | 29  | 手足口病预防控制指南<br>guide of HFMD prevention and<br>control | 30  | 手足口病预防知识<br>knowledge of HFMD<br>prevention  |
| 31  | 手足口病初期症状<br>initial symptoms of HFMD                      | 32  | 手足口病诊疗指南<br>guide of HFMD treatment                   | 33  | 手足口病症状<br>symptoms of HFMD                   |
| 34  | 手足口病症状图片<br>pictures of symptoms of HFMD                  | 35  | 手足口病治疗<br>treatment of HFMD                           | 36  | 手足口病治疗费用<br>treatment charges of HFMD        |
| 37  | 小儿手足口病<br>kids HFMD                                       | 38  | 小儿手足口病的症状<br>symptoms of kids HFMD                    | 39  | 小儿手足口病症状<br>symptoms of kids HFMD            |
| 40  | 小孩手足口病症状<br>symptoms of children HFMD                     | 41  | 预防手足口病<br>prevent HFMD                                | 42  | 怎样预防手足口病<br>how to prevent HFMD              |
| 43  | 重症手足口病<br>severe HFMD                                     | 44  | 手足口病的预防知识<br>knowledge of HFMD<br>prevention          | 45  | 手足口病潜伏期<br>incubation of HFMD                |
| 46  | 手足口病症状和治疗<br>symptoms and treatment of<br>HFMD            |     |                                                       |     |                                              |
