# Supplementary material for: Using Baidu index to nowcast hand-foot-mouth disease in China: a meta learning approach
Source: Springer Nature journal article supplement (doi:10.1186/s12879-018-3285-4), 2018-08-13
Supplement: MOESM2 [file 16031276]

Table S2.1 Forecasting results of monthly HFMD incidences in China

| Date   | Observed | ARIMA  | PCA.LR | RR     | LASSO  | Meta learning |
|--------|----------|--------|--------|--------|--------|---------------|
| Jul-15 | 262239   | 327230 | 257667 | 303767 | 298130 | 257667        |
| Aug-15 | 180813   | 166763 | 114829 | 169555 | 138394 | 114829        |
| Sep-15 | 180074   | 130207 | 203137 | 152913 | 167191 | 167191        |
| Oct-15 | 160106   | 188746 | 121363 | 121310 | 141615 | 121363        |
| Nov-15 | 130829   | 163703 | 256522 | 111621 | 204872 | 111621        |
| Dec-15 | 116239   | 143147 | 101767 | 121350 | 145545 | 121350        |
| Jan-16 | 79499    | 147004 | 40209  | 80413  | 86204  | 80413         |
| Feb-16 | 32457    | 104033 | 66263  | 53590  | 60922  | 53590         |
| Mar-16 | 72464    | 57195  | 107260 | 80140  | 94465  | 80140         |
| Apr-16 | 226430   | 117629 | 140248 | 175883 | 187874 | 175883        |
| May-16 | 442075   | 334818 | 737339 | 596071 | 458885 | 458885        |
| Jun-16 | 452668   | 522996 | 595400 | 517091 | 616163 | 517091        |

Table S2.2 Forecasting results of monthly HFMD incidences in Guangxi

| Date   | Observed | ARIMA | PCA.LR | RR    | LASSO | Meta learning |
|--------|----------|-------|--------|-------|-------|---------------|
| Jul-15 | 15541    | 17617 | 20442  | 21392 | 20204 | 20442         |
| Aug-15 | 21285    | 13693 | 14541  | 16480 | 17504 | 14541         |
| Sep-15 | 43451    | 27456 | 51549  | 33961 | 48366 | 51549         |
| Oct-15 | 33339    | 51903 | 30853  | 27595 | 20362 | 27595         |
| Nov-15 | 15977    | 7331  | 25042  | 18444 | 16196 | 25042         |
| Dec-15 | 10149    | 20604 | 8317   | 12958 | 12996 | 8317          |
| Jan-16 | 8363     | 12072 | 8139   | 5609  | 10899 | 8139          |
| Feb-16 | 4747     | 14048 | 6213   | 3653  | 8582  | 6213          |
| Mar-16 | 13152    | 7911  | 15041  | 12261 | 15009 | 15041         |
| Apr-16 | 53712    | 21889 | 32251  | 32781 | 26886 | 32251         |
| May-16 | 74843    | 70904 | 104464 | 82803 | 63263 | 82803         |
| Jun-16 | 48351    | 64184 | 50206  | 74590 | 59061 | 50206         |

Table S2.3 Forecasting results of monthly HFMD incidences in Zhejiang

| Date   | Observed | ARIMA | PCA.LR | RR    | LASSO | Meta learning |
|--------|----------|-------|--------|-------|-------|---------------|
| Jul-15 | 11508    | 21201 | 16690  | 15384 | 13158 | 15384         |
| Aug-15 | 8753     | 5872  | 718    | 4477  | 4796  | 718           |
| Sep-15 | 5446     | 14746 | 3110   | 5843  | 11023 | 5843          |
| Oct-15 | 7140     | 6122  | 7202   | 4961  | 9644  | 7202          |
| Nov-15 | 10197    | 10497 | 10608  | 6566  | 9376  | 10608         |
| Dec-15 | 11408    | 11395 | 11996  | 11634 | 11666 | 11996         |
| Jan-16 | 8254     | 12205 | 9230   | 6046  | 8077  | 9230          |
| Feb-16 | 2060     | 9157  | 2810   | 1787  | 4299  | 1787          |
| Mar-16 | 5419     | 1600  | 5095   | 6064  | 5439  | 5095          |
| Apr-16 | 14306    | 4204  | 13909  | 13775 | 11663 | 13909         |
| May-16 | 28587    | 13489 | 31019  | 40958 | 23030 | 31019         |
| Jun-16 | 42891    | 22887 | 32520  | 44612 | 36336 | 44612         |

Table S2.4 Forecasting results of monthly HFMD incidences in Henan

| Date   | Observed | ARIMA | PCA.LR | RR    | LASSO | Meta learning |
|--------|----------|-------|--------|-------|-------|---------------|
| Jul-15 | 6026     | 19820 | 8114   | 10924 | 8234  | 8114          |
| Aug-15 | 3408     | 7936  | 3089   | 3944  | 4078  | 3089          |
| Sep-15 | 2828     | 5878  | 1967   | 3688  | 4699  | 1967          |
| Oct-15 | 2623     | 4456  | 3317   | 2104  | 3654  | 3317          |
| Nov-15 | 3297     | 4739  | 4345   | 2453  | 3997  | 4345          |
| Dec-15 | 2857     | 3826  | 3944   | 4155  | 5108  | 3944          |
| Jan-16 | 3104     | 5350  | 2774   | 2343  | 3265  | 2774          |
| Feb-16 | 1435     | 3606  | 2327   | 1628  | 2697  | 1628          |
| Mar-16 | 3388     | 6059  | 3738   | 4975  | 3622  | 3738          |
| Apr-16 | 14706    | 3551  | 8123   | 10449 | 8015  | 8123          |
| May-16 | 29224    | 7108  | 30435  | 29098 | 15531 | 30435         |
| Jun-16 | 23785    | 18400 | 32142  | 26485 | 24302 | 26485         |
